# Supplementary material for: Emotional, Behavioral, and Physical Health Consequences in Caregivers of Children with Cancer: A Network Analysis Differentiation in Mothers’ and Fathers’ Reactivity
Source: MDPI journal article supplement (doi:10.3390/cancers15133496), 2023-07-04
Supplement: s1 [file s1]

## 1. Kellner's Symptom Questionnaire

Please describe how you have felt DURING THE PAST WEEK TO DAY and make a small check mark like this  $\sqrt{\phantom{x}}$ .

For example the word NERVOUS is on the first line: if you have felt nervous check YES like this  $\sqrt{\text{YES}}$  NO

If you have not felt nervous check NO like this YES  $\sqrt{\text{NO}}$

A few times you have the choice of checking either TRUE or FALSE.

Do not think long before answering. Work quickly!

|    |                                     |      |       |
|----|-------------------------------------|------|-------|
| 1  | Nervous                             | YES  | NO    |
| 2  | Weary                               | YES  | NO    |
| 3  | Irritable                           | YES  | NO    |
| 4  | Cheerful                            | YES  | NO    |
| 5  | Tense, tensed up                    | YES  | NO    |
| 6  | Sad, blue                           | YES  | NO    |
| 7  | Happy                               | YES  | NO    |
| 8  | Frightened                          | YES  | NO    |
| 9  | Feeling Calm                        | YES  | NO    |
| 10 | Feeling healthy                     | YES  | NO    |
| 11 | Loosing temper easily               | YES  | NO    |
| 12 | Feeling of not enough air           | TRUE | FALSE |
| 13 | Feeling kind toward people          | YES  | NO    |
| 14 | Feeling fit                         | YES  | NO    |
| 15 | Heavy arms or legs                  | YES  | NO    |
| 16 | Feeling confident                   | YES  | NO    |
| 17 | Feeling warm toward people          | YES  | NO    |
| 18 | Shaky                               | YES  | NO    |
| 19 | No pain anywhere                    | TRUE | FALSE |
| 20 | Angry                               | YES  | NO    |
| 21 | Arms and legs feel strong           | YES  | NO    |
| 22 | Appetite poor                       | YES  | NO    |
| 23 | Feeling peaceful                    | YES  | NO    |
| 24 | Feeling unworthy                    | YES  | NO    |
| 25 | Annoyed                             | YES  | NO    |
| 26 | Feeling of rage                     | YES  | NO    |
| 27 | Cannot enjoy yourself               | YES  | NO    |
| 28 | Tight head or neck                  | YES  | NO    |
| 29 | Relaxed                             | YES  | NO    |
| 30 | Restless                            | YES  | NO    |
| 31 | Feeling friendly                    | YES  | NO    |
| 32 | Feeling of hate                     | YES  | NO    |
| 33 | Choking feeling                     | YES  | NO    |
| 34 | Afraid                              | YES  | NO    |
| 35 | Patient                             | YES  | NO    |
| 36 | Scared                              | YES  | NO    |
| 37 | Furious                             | YES  | NO    |
| 38 | Feeling charitable, forgiving       | YES  | NO    |
| 39 | Feeling guilty                      | YES  | NO    |
| 40 | Feeling well                        | YES  | NO    |
| 41 | Feeling of pressure in head or body | YES  | NO    |
| 42 | Worried                             | YES  | NO    |
| 43 | Contented                           | YES  | NO    |
| 44 | Weak arms or legs                   | YES  | NO    |
| 45 | Feeling desperate, terrible         | YES  | NO    |

|    |                                         |      |       |
|----|-----------------------------------------|------|-------|
| 46 | No aches anywhere                       | TRUE | FALSE |
| 47 | Thinking of death or dying              | YES  | NO    |
| 48 | Hot tempered                            | YES  | NO    |
| 49 | Terrified                               | YES  | NO    |
| 50 | Feeling of courage                      | YES  | NO    |
| 51 | Enjoying yourself                       | YES  | NO    |
| 52 | Breathing difficult                     | YES  | NO    |
| 53 | Parts of the body feel numb or tingling | YES  | NO    |
| 54 | Takes a long time to fall asleep        | YES  | NO    |
| 55 | Feeling hostile                         | YES  | NO    |
| 56 | Infuriated                              | YES  | NO    |
| 57 | Heart beating fast or pounding          | YES  | NO    |
| 58 | Depressed                               | YES  | NO    |
| 59 | Jumpy                                   | YES  | NO    |
| 60 | Feeling a failure                       | YES  | NO    |
| 61 | Not interested in things                | TRUE | FALSE |
| 62 | Highly strung                           | YES  | NO    |
| 63 | Cannot relax                            | TRUE | FALSE |
| 64 | Panicky                                 | YES  | NO    |
| 65 | Pressure on head                        | YES  | NO    |
| 66 | Blaming yourself                        | YES  | NO    |
| 67 | Thoughts of ending your life            | YES  | NO    |
| 68 | Frightening thoughts                    | YES  | NO    |
| 69 | Enraged                                 | YES  | NO    |
| 70 | Irritated by other people               | YES  | NO    |
| 71 | Looking forward toward the future       | YES  | NO    |
| 72 | Nauseated, sick to stomach              | YES  | NO    |
| 73 | Feeling that life is bad                | YES  | NO    |
| 74 | Upset bowels or stomach                 | YES  | NO    |
| 75 | Feeling inferior to others              | YES  | NO    |
| 76 | Feeling useless                         | YES  | NO    |
| 77 | Muscle pains                            | YES  | NO    |
| 78 | No unpleasant feeling s in head or body | TRUE | FALSE |
| 79 | Headaches                               | YES  | NO    |
| 80 | Feel like attacking people              | YES  | NO    |
| 81 | Shaking with anger                      | YES  | NO    |
| 82 | Mad                                     | YES  | NO    |
| 83 | Feeling goodwill                        | YES  | NO    |
| 84 | Feel like crying                        | YES  | NO    |
| 85 | Cramps                                  | YES  | NO    |
| 86 | Feeling that something bad will happen  | YES  | NO    |
| 87 | Wound up, uptight                       | YES  | NO    |
| 88 | Get angry quickly                       | YES  | NO    |
| 89 | Self-confident                          | YES  | NO    |
| 90 | Resentful                               | YES  | NO    |
| 91 | Feeling of hopelessness                 | YES  | NO    |
| 92 | Head pains                              | YES  | NO    |

**Scoring Instructions:**

For symptom subscales add together the following items and score 1 when the answer is Yes/True:

Anxiety (range 0-17): 1, 5, 8, 18, 30, 34, 36, 42, 49, 54, 59, 62,63,64, 68, 86,87

Depression (range 0-17): 2,6,24,27,39,45,47, 58,60,61,66,67,73,75,76,84,91

Somatic Symptoms(range 0-17):12,15,22,28,33,41,44,52,53,57,65,72,74,77,79,85,92

Hostility(range 0-17): 3,11,20,25,26,32,37,48,55,56,69,80,81,82,88,90

For well-being subscales add together the following items and score 1 when the answer is No/False:

Relaxation (range 0-6): 9,16,23,29,50,89

Contentment (range 0-6): 4,7,40,43,51,71

Physical Well-being (range 0-6):10,14,19,21,46,78

Friendliness (range 0-6): 13,17,31,35, 38,83

For the total scale score, add together the symptom subscale with each corresponding well-being subscale (see Table 1 in the text ) :

Anxiety (range 0-23): Anxiety +Relaxation

Depression (range 0-23): Depression+Contentment

Somatization (range 0-23): Somatic Symptoms + Physical Well-Being

Hostility (range 0-23): Hostility + Friendliness
